# Supplementary material for: Multi-response optimization of a green solid-phase extraction for the analysis of heterocyclic aromatic amines in environmental samples
Source: Royal Society of Chemistry journal article supplement (doi:10.1039/c9ay02712b), 2020-01-01
Supplement: c9ay02712b1.pdf [file c9ay02712b1.pdf]

**- Electronic Supplementary Information -**

**Multi-response optimization of a green solid-phase extraction for the analysis of  
heterocyclic aromatic amines in environmental samples**

Romina Canales<sup>a</sup>, Leonardo Mariño-Repizo<sup>a</sup>, Mario Reta<sup>b</sup>, Soledad Cerutti<sup>a,\*</sup>

<sup>a</sup>*Instituto de Química de San Luis, Consejo Nacional de Investigaciones Científicas y Técnicas-Universidad Nacional de San Luis. Facultad de Química, Bioquímica y Farmacia Bloque III, Avda. Ejército de los Andes 950, San Luis, Argentina CP: 5700.*

<sup>b</sup>*Laboratorio de Investigación y Desarrollo de Métodos Analíticos (LIDMA), División Química Analítica, Facultad de Ciencias Exactas, Universidad Nacional de La Plata, 47 y 115 (B1900AJL) 1900 La Plata, Argentina.*

\*Corresponding author:

E-mail address: E-mail: [ecerutti@gmail.com](mailto:ecerutti@gmail.com) (S. Cerutti)

Phone: +54-0266-4520300 (\*1311)

| Run | A       | B          | C                                         | D                   | ERs (%) |      |      |       |             |      |        |       |       |        |
|-----|---------|------------|-------------------------------------------|---------------------|---------|------|------|-------|-------------|------|--------|-------|-------|--------|
|     | ACN (%) | HCOOH (mM) | Elution flow rate (mL min <sup>-1</sup> ) | Elution volume (μL) | DMIP    | IQ   | MeIQ | MeIQx | 4,8-DiMeIQx | PhIP | Trp-P1 | AαC   | MeAαC | Trp-P2 |
| 1   | 50      | 0.008      | 0.33                                      | 750                 | 73.1    | 75.9 | 78.3 | 73.7  | 76.6        | 82.4 | 72.3   | 85.9  | 78.9  | 73.1   |
| 2   | 60      | 0.016      | 0.15                                      | 500                 | 93      | 90.8 | 92.5 | 88.04 | 88.4        | 87.9 | 82.7   | 87.5  | 89.9  | 82.5   |
| 3   | 60      | 0.004      | 0.15                                      | 1000                | 80.7    | 82.5 | 82.2 | 79    | 80.8        | 79.9 | 69.4   | 79.5  | 77.2  | 71.9   |
| 4   | 60      | 0.004      | 0.50                                      | 1000                | 88.9    | 90.8 | 91.3 | 82.3  | 86.9        | 74.7 | 77.9   | 69.9  | 74.2  | 70.1   |
| 5   | 40      | 0.016      | 0.50                                      | 1000                | 63.1    | 67.6 | 60.5 | 75.1  | 65.7        | 57.6 | 74.9   | 66.3  | 69.8  | 72.6   |
| 6   | 60      | 0.004      | 0.50                                      | 500                 | 85.9    | 82.6 | 84.5 | 82.7  | 80.3        | 80.3 | 70.9   | 82.3  | 65.3  | 68.4   |
| 7   | 50      | 0.008      | 0.33                                      | 750                 | 75.9    | 71.3 | 77.2 | 79.1  | 73.9        | 78.8 | 79.3   | 84.2  | 81.1  | 78.5   |
| 8   | 60      | 0.004      | 0.15                                      | 500                 | 82.1    | 83.1 | 86.9 | 80.2  | 82.5        | 71   | 66.1   | 73.5  | 73.8  | 82.7   |
| 9   | 40      | 0.004      | 0.50                                      | 1000                | 58      | 55.7 | 56.8 | 62.5  | 53.8        | 58.6 | 70.7   | 60.1  | 71.2  | 53.5   |
| 10  | 40      | 0.004      | 0.50                                      | 500                 | 56.1    | 53.9 | 42.7 | 54.3  | 56.2        | 50.1 | 59.1   | 56.4  | 47.5  | 69.2   |
| 11  | 40      | 0.016      | 0.15                                      | 500                 | 56.9    | 54.9 | 59.2 | 53.8  | 51.8        | 47.1 | 52.8   | 41.7  | 54.8  | 51.8   |
| 12  | 60      | 0.016      | 0.50                                      | 1000                | 94.1    | 97.1 | 96.4 | 98.5  | 92.9        | 97.2 | 95.5   | 96.5  | 92.7  | 91.1   |
| 13  | 50      | 0.008      | 0.33                                      | 750                 | 72.9    | 76.2 | 72.9 | 75.27 | 77.9        | 75.6 | 76.6   | 78.5  | 73.9  | 80.5   |
| 14  | 40      | 0.004      | 0.15                                      | 1000                | 38.1    | 42.9 | 37.8 | 44.02 | 52.7        | 61.4 | 38.2   | 50.4  | 50.5  | 41.9   |
| 15  | 40      | 0.016      | 0.15                                      | 1000                | 62.1    | 68.2 | 61.1 | 70.5  | 70.2        | 68.4 | 86.8   | 61.2  | 65.8  | 70.6   |
| 16  | 60      | 0.016      | 0.50                                      | 500                 | 92      | 92.5 | 97.4 | 95.74 | 94.2        | 99.9 | 93.1   | 97.06 | 92.8  | 95     |
| 17  | 60      | 0.016      | 0.15                                      | 1000                | 82.1    | 86.5 | 85.9 | 84.4  | 84.1        | 75.1 | 76.1   | 80.8  | 87.9  | 83.7   |
| 18  | 40      | 0.016      | 0.50                                      | 500                 | 60.1    | 63.4 | 59.7 | 58.7  | 66.3        | 69.5 | 81.9   | 72.6  | 70.5  | 72.1   |
| 19  | 40      | 0.04       | 0.15                                      | 500                 | 30.2    | 41.1 | 36.7 | 38.4  | 34.1        | 38.5 | 30.5   | 36.7  | 35.58 | 40.7   |

**Table S1.** Experiments and responses of the HAAs in the 2<sup>4</sup> full factorial design.

**Table S2.** ANOVA test results obtained from the first (2<sup>4</sup>) full factorial design for IQ response (model analyte).

| Source             | Sum of Squares | <i>df</i> <sup>a</sup> | Mean Square | <i>F</i> <sub>value</sub> <sup>b</sup> | <i>P</i> <sub>value</sub> <sup>c</sup> | Prob> <i>F</i>         |
|--------------------|----------------|------------------------|-------------|----------------------------------------|----------------------------------------|------------------------|
| <b>Model</b>       | 4834.67        | 3                      | 1611.56     | 78.19                                  | <0.0001                                | <i>significant</i>     |
| <b>A</b>           | 4166.70        | 1                      | 4166.70     | 202.1                                  | <0.0001                                |                        |
| <b>B</b>           | 488.41         | 1                      | 488.41      | 23.70                                  | <0.0002                                |                        |
| <b>C</b>           | 179.56         | 1                      | 179.56      | 8.71                                   | <0.0105                                |                        |
| <b>Curvature</b>   | 14.15          | 1                      | 14.15       | 0.69                                   | 0.4212                                 | <i>not significant</i> |
| <b>Residual</b>    | 288.55         | 14                     | 20.61       |                                        |                                        |                        |
| <b>Lack of Fit</b> | 273.47         | 12                     | 22.79       | 3.02                                   | 0.2754                                 | <i>not significant</i> |
| <b>Pure error</b>  | 15.09          | 2                      | 7.54        |                                        |                                        |                        |
| <b>Cor total</b>   | 5137.38        | 18                     |             |                                        |                                        |                        |

<sup>a</sup> Degrees of freedom; <sup>b</sup> Test for comparing model variance with residual (error) variance; <sup>c</sup> Probability of seeing the observed *F* value if the null hypothesis is true.

**Table S3.** ANOVA test results obtained from the first full ( $2^4$ ) factorial design for Trp-P-2 response (model analyte).

| Source             | Sum of Squares | $df^a$ | Mean Square | $F_{\text{value}}^b$ | $P_{\text{value}}^c$ | Prob> $F$              |
|--------------------|----------------|--------|-------------|----------------------|----------------------|------------------------|
| <b>Model</b>       | 3059.53        | 3      | 1019.84     | 17.52                | <0.0001              | <i>significant</i>     |
| <b>A</b>           | 1870.56        | 1      | 1870.56     | 32.14                | <0.0001              |                        |
| <b>B</b>           | 915.06         | 1      | 915.06      | 15.72                | <0.0001              |                        |
| <b>C</b>           | 273.90         | 1      | 273.90      | 4.71                 | 0.0478               |                        |
| <b>Curvature</b>   | 142.26         | 1      | 142.26      | 2.44                 | 0.1403               | <i>not significant</i> |
| <b>Residual</b>    | 814.86         | 14     | 58.20       |                      |                      |                        |
| <b>Lack of Fit</b> | 785.55         | 12     | 65.46       | 4.47                 | 0.1973               | <i>not significant</i> |
| <b>Pure error</b>  | 29.31          | 2      | 14.65       |                      |                      |                        |
| <b>Cor total</b>   | 4016.65        | 18     |             |                      |                      |                        |

<sup>a</sup> Degrees of freedom; <sup>b</sup> Test for comparing model variance with residual (error) variance; <sup>c</sup> Probability of seeing the observed  $F$  value if the null hypothesis is true.

**Table S4.** Experiments and responses of the HAAs in the 2<sup>3</sup> full factorial design.

| Run | A       | B          | C                                         | ERs (%) |       |       |       |             |        |         |       |       |         |
|-----|---------|------------|-------------------------------------------|---------|-------|-------|-------|-------------|--------|---------|-------|-------|---------|
|     | ACN (%) | HCOOH (mM) | Elution flow rate (mL min <sup>-1</sup> ) | DMIP    | IQ    | MeIQ  | MeIQx | 4,8-DiMeIQx | PhIP   | Trp-P-1 | AαC   | MeAαC | Trp-P-2 |
| 1   | 80.00   | 0.06       | 0.80                                      | 99.337  | 95.38 | 92.29 | 98.04 | 96.79       | 100.21 | 90.32   | 97.25 | 96.1  | 93.5    |
| 2   | 60.00   | 0.03       | 0.50                                      | 80.167  | 83.02 | 80.04 | 89.38 | 86.95       | 91.06  | 80.18   | 88.09 | 86.8  | 81.74   |
| 3   | 80.00   | 0.00       | 0.80                                      | 85.558  | 80.75 | 82.89 | 93.32 | 85.87       | 95.65  | 81.8    | 88.09 | 82.21 | 84.53   |
| 4   | 40.00   | 0.06       | 0.20                                      | 72.6896 | 73.96 | 68.05 | 76.05 | 80.21       | 80.1   | 67.1    | 92.42 | 76.55 | 70.1    |
| 5   | 40.00   | 0.06       | 0.80                                      | 76.524  | 72.89 | 65.08 | 74.76 | 75.82       | 79.17  | 63.8    | 78.97 | 72.7  | 68.83   |
| 6   | 60.00   | 0.03       | 0.50                                      | 77.501  | 82.12 | 76.45 | 90.18 | 93.9        | 89.08  | 78.6    | 87.55 | 80.99 | 78.16   |
| 7   | 40.00   | 0.00       | 0.80                                      | 62.89   | 54.2  | 63.01 | 66.27 | 68.9        | 72.61  | 60.6    | 68.57 | 60.89 | 62.57   |
| 8   | 80.00   | 0.00       | 0.20                                      | 88.412  | 82.93 | 85.85 | 90.52 | 84.72       | 86.51  | 79.3    | 90.49 | 84.46 | 86.94   |
| 9   | 80.00   | 0.06       | 0.20                                      | 96.611  | 98.27 | 91.14 | 99.34 | 99.22       | 101.4  | 93.8    | 98.1  | 95.86 | 95.66   |
| 10  | 60.00   | 0.03       | 0.50                                      | 79.4029 | 90.58 | 84.48 | 93.87 | 85.2        | 93.57  | 86.6    | 89.08 | 89.8  | 85.1    |
| 11  | 60.00   | 0.03       | 0.50                                      | 76.912  | 76.55 | 84.92 | 91.58 | 94.13       | 92.16  | 87.1    | 87.89 | 78.96 | 86      |
| 12  | 40.00   | 0.00       | 0.20                                      | 63.1233 | 53.4  | 64.79 | 62.27 | 70.39       | 70.59  | 56.9    | 69.6  | 63.5  | 63.19   |
| 13  | 60.00   | 0.03       | 0.50                                      | 78.757  | 81.15 | 79.76 | 82.02 | 81.12       | 89.54  | 89.6    | 86.74 | 89.9  | 80.64   |

| Source             | Sum of Squares | df <sup>a</sup> | Mean Square | <i>F</i> <sub>value</sub> <sup>b</sup> | <i>P</i> <sub>value</sub> <sup>c</sup> | Prob> <i>F</i>         |
|--------------------|----------------|-----------------|-------------|----------------------------------------|----------------------------------------|------------------------|
| <b>Model</b>       | 1921.96        | 2               | 960.98      | 71.50                                  | <0.0001                                | <i>significant</i>     |
| <b>A</b>           | 1323.04        | 1               | 1323.04     | 98.44                                  | <0.0001                                |                        |
| <b>B</b>           | 598.93         | 1               | 598.93      | 44.56                                  | <0.0002                                |                        |
| <b>Curvature</b>   | 118.72         | 1               | 118.72      | 8.83                                   | 0.0157                                 | <i>significant</i>     |
| <b>Residual</b>    | 120.97         | 9               | 13.44       |                                        |                                        |                        |
| <b>Lack of Fit</b> | 18.21          | 5               | 3.64        | 0.14                                   | 0.2754                                 | <i>not significant</i> |
| <b>Pure error</b>  | 102.76         | 4               | 25.69       |                                        |                                        |                        |
| <b>Cor total</b>   | 2161.65        | 12              |             |                                        |                                        |                        |

**Table S5.** ANOVA test results for the IQ response obtained in the second (2<sup>3</sup>) full factorial design.

<sup>a</sup> Degrees of freedom; <sup>b</sup> Test for comparing model variance with residual (error) variance; <sup>c</sup> Probability of seeing the observed *F* value if the null hypothesis is true.

| Source             | Sum of Squares | df <sup>a</sup> | Mean Square | <i>F</i> value <sup>b</sup> | <i>P</i> value <sup>c</sup> | Prob> <i>F</i>         |
|--------------------|----------------|-----------------|-------------|-----------------------------|-----------------------------|------------------------|
| <b>Model</b>       | 1269.60        | 2               | 634.80      | 113.08                      | <0.0001                     | <i>significant</i>     |
| <b>A</b>           | 1150.56        | 1               | 1150.56     | 204.95                      | <0.0001                     |                        |
| <b>B</b>           | 119.04         | 1               | 119.04      | 21.21                       | <0.0002                     |                        |
| <b>Curvature</b>   | 53.32          | 1               | 53.32       | 9.50                        | 0.0131                      | <i>significant</i>     |
| <b>Residual</b>    | 50.52          | 9               | 5.61        |                             |                             |                        |
| <b>Lack of Fit</b> | 8.79           | 5               | 1.76        | 0.17                        | 0.9613                      | <i>not significant</i> |
| <b>Pure error</b>  | 41.73          | 4               | 10.43       |                             |                             |                        |
| <b>Cor total</b>   | 1373.45        | 12              |             |                             |                             |                        |

**Table S6.** ANOVA test results for Trp-P-2 response obtained of the second (2<sup>3</sup>) full factorial design.

<sup>a</sup> Degrees of freedom; <sup>b</sup> Test for comparing model variance with residual (error) variance; <sup>c</sup> Probability of seeing the observed *F* value if the null hypothesis is true.

**Table S7.** Experiments and responses of the HAAs in the DCC.

| A       |            | B    |      | ERs (%) |       |             |      |      |       |         |         |
|---------|------------|------|------|---------|-------|-------------|------|------|-------|---------|---------|
| ACN (%) | HCOOH (mM) | DMIP | IQ   | MeIQ    | MeIQx | 4,8-DiMeIQx | PhIP | AαC  | MeAαC | Trp-P-1 | Trp-P-2 |
| 80.0    | 15.9       | 98.4 | 95.6 | 90.5    | 93.7  | 97.1        | 97.3 | 98.5 | 98.2  | 96.7    | 94.6    |
| 60.0    | 8.5        | 83.6 | 88.2 | 80.5    | 83.5  | 91.3        | 92.3 | 95.5 | 93.8  | 97.9    | 96.6    |
| 40.0    | 1.1        | 60.5 | 66.1 | 62.4    | 66.9  | 68.2        | 98.2 | 93.3 | 82.2  | 91.4    | 99.8    |
| 60.0    | 0.0        | 62.6 | 57.8 | 64.7    | 67.5  | 63.9        | 87.0 | 81.5 | 64.2  | 85.6    | 86.8    |
| 60.0    | 8.5        | 80.9 | 84.7 | 80.2    | 86.9  | 80.9        | 81.7 | 84.1 | 82.2  | 85.5    | 81.8    |
| 24.6    | 8.5        | 72.2 | 77.8 | 74.5    | 78.8  | 73.1        | 72.5 | 76.7 | 72.9  | 76.6    | 78.2    |
| 60.0    | 8.5        | 89.9 | 81.9 | 83.0    | 85.8  | 89.2        | 95.0 | 96.1 | 98.9  | 92.1    | 93.3    |
| 60.0    | 8.5        | 81.3 | 81.8 | 87.8    | 83.6  | 92.8        | 94.6 | 92.7 | 81.6  | 86.0    | 84.2    |
| 60.0    | 21.0       | 87.1 | 83.6 | 85.8    | 83.6  | 91.5        | 96.1 | 96.1 | 95.9  | 97.5    | 94.5    |
| 40.0    | 15.9       | 75.5 | 94.8 | 90.8    | 85.6  | 91.4        | 87.7 | 89.4 | 75.4  | 88.8    | 82.0    |
| 80.0    | 1.1        | 78.6 | 86.7 | 81.9    | 79.3  | 73.3        | 43.4 | 59.0 | 71.6  | 63.5    | 51.6    |
| 60.0    | 8.5        | 82.5 | 84.4 | 88.9    | 82.0  | 87.4        | 66.2 | 77.4 | 85.8  | 83.1    | 79.9    |



**Table S8.** CCD fitting models for HAAs analysis in surface water samples.

| Response           | Model     | $R^2$  | $R^2_{adj}$ | Transformation | Significant terms (x)      | ANOVA $p$ -value <sup>a</sup> |             |
|--------------------|-----------|--------|-------------|----------------|----------------------------|-------------------------------|-------------|
|                    |           |        |             |                |                            | Model                         | Lack of fit |
| R1-DMIP            | Quadratic | 0.9235 | 0.8980      | None*          | A - B - B <sup>2</sup>     | <0.0001                       | 0.5854      |
| R2-IQ              | *         | 0.8804 | 0.8207      | *              | A -B - AB - B <sup>2</sup> | <0.0001                       | 0.0650      |
| R3-MeIQ            | *         | 0.9268 | 0.8902      | *              | A -B - AB - B <sup>2</sup> | <0.0001                       | 0.8091      |
| R4-MeIQx           | *         | 0.9525 | 0.9367      | *              | A - B - B <sup>2</sup>     | <0.0001                       | 0.4592      |
| R5-4,8-DiMeIQx     | *         | 0.9030 | 0.8707      | *              | A - B - B <sup>2</sup>     | <0.0001                       | 0.6998      |
| R6-PhIP            | *         | 0.7670 | 0.6505      | *              | A -B - AB - A <sup>2</sup> | <0.0120                       | 0.7833      |
| R7-A $\alpha$ C    | *         | 0.8553 | 0.7830      | *              | A -B - AB - A <sup>2</sup> | <0.019                        | 0.8326      |
| R8- MeA $\alpha$ C | *         | 0.7002 | 0.6002      | *              | A -B - AB - A <sup>2</sup> | <0.0287                       | 0.6070      |
| R9-Trp-P-1         | *         | 0.8852 | 0.8278      | *              | A -B - AB - A <sup>2</sup> | <0.0001                       | 0.7340      |
| R10-Trp-P-2        | *         | 0.8716 | 0.8074      | *              | A -B - AB - A <sup>2</sup> | <0.0012                       | 0.8282      |

A: ACN (%) in ACN/H<sub>2</sub>O mixture elution; B: HCOOH concentration; <sup>a</sup> $p$ -values less than 0.050 indicate significance; \* applied to each Response

**Table S9.** Analytical yields of HAAs in surface water samples by MWCNTs-SPE as clean-up and preconcentration strategy.

| Surface water sample |                                               | <i>Cosquin River</i>           |                                |              |               | <i>San Roque Reservoir</i>                    |                                |                                |              |               |
|----------------------|-----------------------------------------------|--------------------------------|--------------------------------|--------------|---------------|-----------------------------------------------|--------------------------------|--------------------------------|--------------|---------------|
| HAAs                 | Sample Concentration ( $\mu\text{g L}^{-1}$ ) | Added ( $\mu\text{g L}^{-1}$ ) | Found ( $\mu\text{g L}^{-1}$ ) | Recovery (%) | RSD (%) $n=3$ | Sample Concentration ( $\mu\text{g L}^{-1}$ ) | Added ( $\mu\text{g L}^{-1}$ ) | Found ( $\mu\text{g L}^{-1}$ ) | Recovery (%) | RSD (%) $n=3$ |
| DMIP                 | N.D.*                                         | 0.0                            | -                              | -            | -             | *                                             | 0.0                            | -                              | -            | -             |
|                      |                                               | 0.5                            | 0.51                           | 102.0        | 2.6           |                                               | 0.5                            | 0.53                           | 106.0        | 3.7           |
|                      |                                               | 1.0                            | 1.05                           | 105.0        | 3.8           |                                               | 1.0                            | 0.98                           | 98.0         | 3.1           |
| IQ                   | *                                             | 2.0                            | 1.95                           | 97.5         | 5.2           | 0.48 <sup>a</sup>                             | 2.0                            | 2.00                           | 100.0        | 3.4           |
|                      |                                               | 0.0                            | -                              | -            | -             |                                               | 0.0                            | 0.48 <sup>a</sup>              | -            | -             |
|                      |                                               | 0.5                            | 0.48 <sup>a</sup>              | 96.0         | 6.7           |                                               | 0.5                            | 0.49                           | 98.9         | 8.3           |
| MeIQ                 | 0.56                                          | 1.0                            | 0.97                           | 97.0         | 8.9           | 0.92                                          | 1.0                            | 1.40                           | 94.6         | 4.3           |
|                      |                                               | 2.0                            | 2.02                           | 101.0        | 6.0           |                                               | 2.0                            | 2.47                           | 99.6         | 6.2           |
|                      |                                               | 0.0                            | 0.56                           | -            | -             |                                               | 0.0                            | 0.92                           | -            | -             |
| MeIQx                | 0.24                                          | 0.5                            | 1.03                           | 97.2         | 5.1           | 0.71                                          | 0.5                            | 1.43                           | 100.7        | 2.9           |
|                      |                                               | 1.0                            | 1.46                           | 93.6         | 5.8           |                                               | 1.0                            | 1.92                           | 100.0        | 6.4           |
|                      |                                               | 2.0                            | 1.85                           | 92.5         | 1.8           |                                               | 2.0                            | 1.97                           | 98.5         | 4.2           |
| 4,8-DiMeIQx          | 0.16 <sup>a</sup>                             | 0.0                            | 0.24                           | -            | -             | 0.62                                          | 0.0                            | 0.71                           | -            | -             |
|                      |                                               | 0.5                            | 0.71                           | 95.9         | 6.9           |                                               | 0.5                            | 1.19                           | 98.3         | 3.0           |
|                      |                                               | 1.0                            | 1.20                           | 96.8         | 2.5           |                                               | 1.0                            | 1.70                           | 99.4         | 6.1           |
| PhIP                 | *                                             | 2.0                            | 1.97                           | 98.5         | 5.6           | 0.56                                          | 2.0                            | 1.99                           | 99.5         | 5.0           |
|                      |                                               | 0.0                            | 0.16                           | -            | -             |                                               | 0.0                            | 0.62                           | -            | -             |
|                      |                                               | 0.3                            | 0.63                           | 94.7         | 5.3           |                                               | 0.5                            | 1.12                           | 100.0        | 5.9           |
| Trp-P-1              | 0.32                                          | 1.0                            | 1.11                           | 95.8         | 2.6           | 0.93                                          | 1.0                            | 1.64                           | 101.2        | 6.2           |
|                      |                                               | 5.0                            | 4.96                           | 99.2         | 3.7           |                                               | 5.0                            | 4.99                           | 99.8         | 4.8           |
|                      |                                               | 0.0                            | -                              | -            | -             |                                               | 0.0                            | 0.56                           | -            | -             |
| AaC                  | 0.21                                          | 0.5                            | 0.49                           | 98.0         | 2.82          | 0.37                                          | 0.5                            | 0.96                           | 90.6         | 6.3           |
|                      |                                               | 1.0                            | 0.99                           | 99.0         | 7.20          |                                               | 1.0                            | 1.45                           | 92.9         | 5.1           |
|                      |                                               | 2.0                            | 1.97                           | 98.5         | 3.00          |                                               | 2.0                            | 1.99                           | 99.5         | 8.1           |
| Trp-P-2              | 0.51                                          | 0.0                            | 0.32                           | -            | -             | 0.76                                          | 0.0                            | 0.93                           | -            | -             |
|                      |                                               | 0.5                            | 0.81                           | 98.8         | 6.8           |                                               | 0.5                            | 1.46                           | 102.1        | 4.8           |
|                      |                                               | 1.0                            | 1.30                           | 98.5         | 3.4           |                                               | 1.0                            | 2.02                           | 104.7        | 2.6           |
| MeAaC                | 0.35 <sup>a</sup>                             | 5.0                            | 5.03                           | 100.6        | 2.7           | 0.56                                          | 5.0                            | 5.29                           | 105.8        | 7.7           |
|                      |                                               | 0.0                            | 0.21                           | -            | -             |                                               | 0.0                            | 0.37                           | -            | -             |
|                      |                                               | 0.5                            | 0.69                           | 97.2         | 5.2           |                                               | 0.5                            | 0.88                           | 101.1        | 6.4           |
|                      |                                               | 1.0                            | 1.18                           | 97.5         | 6.9           |                                               | 1.0                            | 1.34                           | 97.8         | 4.0           |
|                      |                                               | 2.0                            | 1.99                           | 99.5         | 7.4           |                                               | 2.0                            | 1.97                           | 98.5         | 4.9           |
|                      |                                               | 0.0                            | 0.51                           | -            | -             |                                               | 0.0                            | 0.76                           | -            | -             |
|                      |                                               | 0.5                            | 0.98                           | 97.0         | 5.3           |                                               | 0.5                            | 1.20                           | 95.2         | 4.8           |
|                      |                                               | 1.0                            | 1.48                           | 98.0         | 4.3           |                                               | 1.0                            | 1.74                           | 98.8         | 2.3           |
|                      |                                               | 2.0                            | 2.03                           | 101.5        | 2.4           |                                               | 2.0                            | 1.95                           | 97.5         | 4.8           |
|                      |                                               | 0.0                            | 0.35                           | -            | -             |                                               | 0.0                            | 0.56                           | -            | -             |
|                      |                                               | 0.5                            | 0.86                           | 101.2        | 5.9           |                                               | 0.5                            | 1.04                           | 98.1         | 4.7           |
|                      |                                               | 1.0                            | 1.42                           | 105.2        | 4.8           |                                               | 1.0                            | 1.59                           | 101.9        | 6.3           |
|                      |                                               | 2.0                            | 1.98                           | 99.0         | 3.7           |                                               | 2.0                            | 1.98                           | 99.0         | 2.9           |

N.D.\*: not detected; <sup>a</sup><LOQ.
